# Supplementary material for: Second-Shell Basic Residues Expand the Two-Metal-Ion Architecture of DNA and RNA Processing Enzymes
Source: PubMed Central journal article supplement (PMC5758106; doi:10.1016/j.str.2017.11.008), 2018-01-02
Supplement: mmc1.pdf [file mmc1.pdf]

**Structure, Volume 26**

**Supplemental Information**

**Second-Shell Basic Residues Expand  
the Two-Metal-Ion Architecture of DNA  
and RNA Processing Enzymes**

**Vito Genna, Matteo Colombo, Marco De Vivo, and Marco Marcia**

1 SUPPLEMENTAL INFORMATION FOR:

2  
3 **Second-shell basic residues expand the two-metal-ion**  
4 **architecture of DNA and RNA processing enzymes.**

5 Vito Genna<sup>1,#</sup>, Matteo Colombo<sup>2,#</sup>, Marco De Vivo<sup>1,3,\*</sup>, Marco Marcia<sup>2,\*</sup>

6  
7 \*To whom correspondence should be addressed. E-mail: marco.devivo@iit.it; mmarcia@embl.fr  
8  
9  
10  
11  
12  
13  
14  
15  
16  
17  
18  
19  
20  
21  
22  
23  
24  
25  
26  
27  
28

29 The supplemental information file contains:

- 30 - Fig. S1 (Related to Fig. 1)
- 31 - Fig. S2 (Related to Fig. 2)
- 32 - Fig. S3 (Related to Fig. 3)
- 33 - Table S2 (Related to Table 1)
- 34 - Table S3 (Related to Fig. 3)
- 35 - Table S4 (Related to Fig. 3)

1 **Supplemental Figures and Tables**

2 **Fig. S1: Additional examples of nucleases and polymerases possessing K1- and K2-like residues**  
3 (Related to Fig. 1). A) Restriction endonuclease EcoRI (PDB id.: 1QPS); B) Restriction endonuclease  
4 PvuII (1F00); C) Endonuclease MutH (2AOR); D) RNase-H (3O3H); E) DNA polymerase Pol- $\alpha$   
5 (2ALZ); and F) Norwalk virus RdRp (PDB id.: 3BSO). Structural elements are oriented and color coded  
6 as in Fig. 1.

7

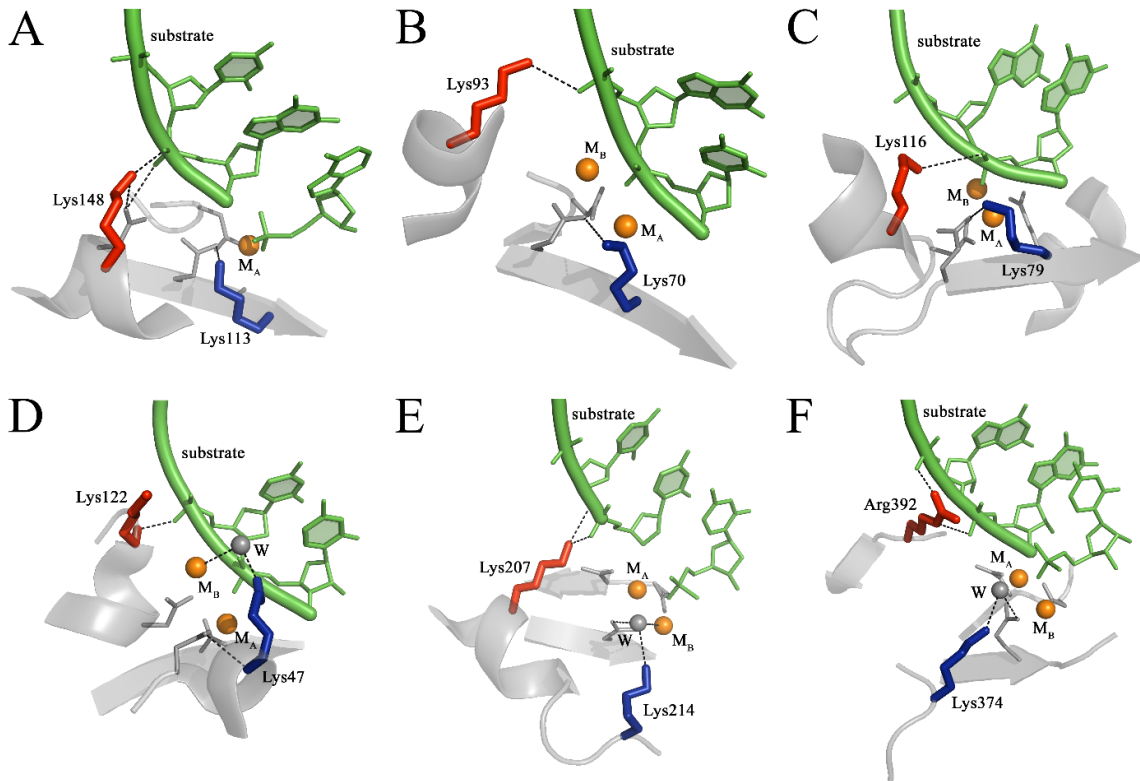

8

9

10

1 **Fig. S2: Structural overlap of K1- and K2-like residues in selected subsets of two-metal-ion**  
 2 **enzymes** (Related to Fig. 2). **Subset of ribozymes:** overlap of the structures of the group II intron  
 3 (4FAR) and of the spliceosome (5LJ3, putative K1 ion and K2-like Lys611, see also Fig. 5 for details).  
 4 Only the exon (substrate) and  $M_A$ - $M_B$  center of 4FAR are represented for clarity. **Subset of restriction**  
 5 **endonucleases:** overlap of the structures of BamHI (2BAM), PvuII (1F0O), BpuSI (3S1S), MspI  
 6 (1SA3), FokI (1FOK), and NaeI (1IAW). Only the substrate and  $M_A$ - $M_B$  center of 2BAM are  
 7 represented for clarity. **Subset of Cas9-like nucleases:** overlap of the structures of the RuvC domain  
 8 of Cas9 nucleases from *S. pyogenes* (4CMQ/5F9R, see also Figure 1C), *A. naeslundii* (4OGC), *F.*  
 9 *tularensis* (5B2O), and *S. aureus* (5AXW), and of RNase-H from *T. maritima* (3O3H) and *H. sapiens*  
 10 (3PUF). Only the substrate and  $M_A$ - $M_B$  center of *S. pyogenes* Cas9 are represented for clarity. **Curated**  
 11 **subset of evolutionarily-related DNA polymerases:** overlap of the structures of human (PDB id 4ECS)  
 12 and yeast (3MFI) DNA polymerase  $\eta$ , human DNA polymerase  $\iota$  (2ALZ), human DNA polymerase  $\kappa$   
 13 (2OH2), *S. solfataricus* Dpo4 (2AGO), and *E. coli* DinB (4IRK). Only the substrate and  $M_A$ - $M_B$  center  
 14 of 4ECS are represented for clarity. **Subset of viral RdRps:** overlap of the structures of the RdRps  
 15 from Norwalk virus (3BSO), Sapporo virus (2UUW), Rabbit haemorrhagic disease virus (1KHV),  
 16 Poliovirus (1RDR), Foot-and-mouth disease virus (2E9T), Hepatitis C virus (4E78), and Dengue virus  
 17 (2J7U). Only the substrate and  $M_A$ - $M_B$  center of 3BSO are represented for clarity. **Subset of eukaryotic**  
 18 **DdRps:** overlap of the structures of yeast Pol-I (5M5Y), Pol-II (2E2H), and Pol-III (5FJ8). Only the  
 19 substrate and  $M_A$ - $M_B$  center of 2E2H are represented for clarity. The structures were aligned and  
 20 represented as described in Fig. 2. Sites 3 and 4 are defined in Fig. 4 and in the main text.

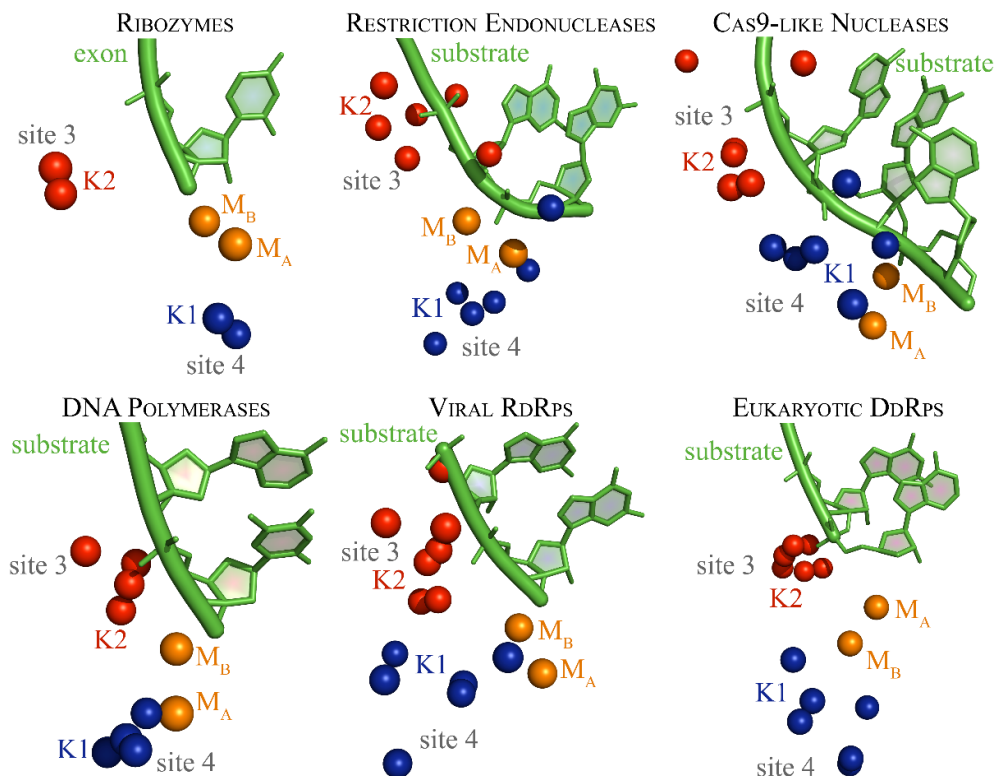



1 **Fig. S3: Structural superimposition of the wild type and the mutated Pol- $\eta$  in complex with**  
2 **dsDNA and dATP from molecular dynamics simulations** (Related to Fig. 3). A) Superimposition  
3 between human wild-type DNA Pol- $\eta$  (white) and K231A mutant (grey). B) Superimposition between  
4 human wild-type DNA Pol- $\eta$  (white) and K224A mutant (ochre). C) Superimposition between human  
5 wild-type DNA Pol- $\eta$  (white) and K224A/K231A mutant (cyan). Spheres indicate magnesium ions  
6 while the nucleic acid substrate, dATP, and the K1- and K2-like residues are reported in licorice. These  
7 superpositions show the significant distortion of the reactant state upon mutations of K1- and/or K2-  
8 like residues.  
9

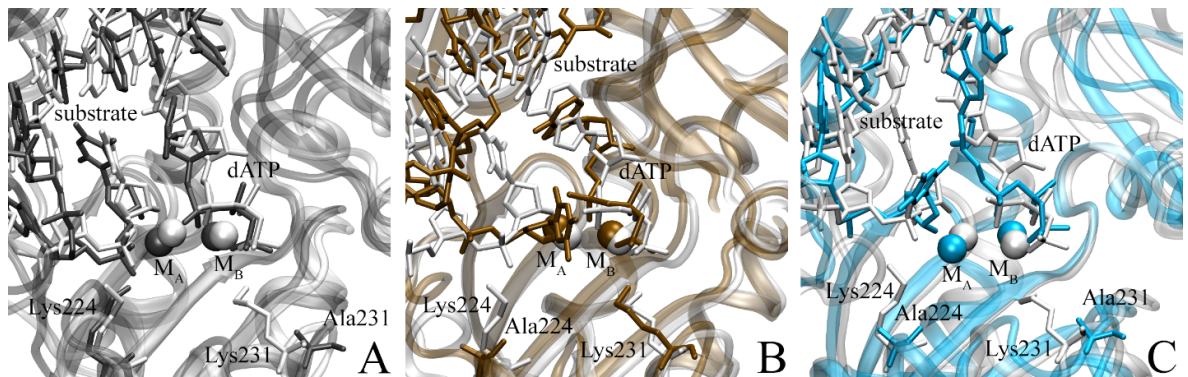

1 **Table S2. Prediction of K1- and K2-like residues in other classes of two-metal-ion enzymes (Related to Table 1).**

2

| Enzyme                               | PDB id | Resolution (Å) | Enzymatic Classification (E.C.) | K1               | d1 (Å) <sup>a</sup> | d-ac (Å) <sup>b</sup> | mutants                        | functional defect | K2              | d2 (Å) <sup>a</sup> | d-sub (Å) <sup>c</sup> | mutants                     | functional defect |
|--------------------------------------|--------|----------------|---------------------------------|------------------|---------------------|-----------------------|--------------------------------|-------------------|-----------------|---------------------|------------------------|-----------------------------|-------------------|
| Spliceosome ( <i>S. cerevisiae</i> ) | 5LJ3   | 3.80           | ribozyme                        | K17 <sup>d</sup> | ~3.8                | ~2.6                  | n.a.                           | n.a.              | Lys611 (Prp8)   | 9.08                | 3.67                   | n.a.                        | n.a.              |
|                                      |        |                |                                 |                  |                     |                       |                                |                   | Arg614 (Prp8)   | 9.88                | 3.38                   | n.a.                        | n.a.              |
| RNA Pol-I ( <i>S. cerevisiae</i> )   | 5M5Y   | 4.00           | 2.7.7.6                         | Lys934 (RPA190)  | x <sup>e</sup>      | 8.49                  | n.a.                           | n.a.              | Lys916 (RPA135) | x <sup>e</sup>      | 3.44                   | n.a.                        | n.a.              |
|                                      |        |                |                                 | Arg957 (RPA135)  | x <sup>e</sup>      | 5.13                  | n.a.                           | n.a.              | Lys924 (RPA135) | x <sup>e</sup>      | 2.36                   | n.a.                        | n.a.              |
| RNA Pol-II ( <i>S. cerevisiae</i> )  | 2E2H   | 3.95           | 2.7.7.6                         | Lys752 (Rbp1)    | 5.40                | 4.03                  | K752L (Strathern et al., 2013) | Lethal            | Lys979 (Rbp2)   | 8.86                | 2.58                   | K979R (Treich et al., 1992) | Lethal            |
|                                      |        |                |                                 | Arg1020 (Rbp2)   | 3.12                | 3.57                  | n.a.                           | n.a.              | Lys987 (Rbp2)   | 7.13                | 3.34                   | K987R (Treich et al., 1992) | Lethal            |
| RNA Pol-III ( <i>S. cerevisiae</i> ) | 5FJ8   | 3.90           | 2.7.7.6                         | Lys800 (Rpc1)    | x <sup>e</sup>      | 9.71                  | n.a.                           | n.a.              | Lys911 (Rpc2)   | x <sup>e</sup>      | 3.75                   | n.a.                        | n.a.              |
|                                      |        |                |                                 | Arg952(Rpc2)     | x <sup>e</sup>      | 7.55                  | n.a.                           | n.a.              | Lys919 (Rpc2)   | x <sup>e</sup>      | 4.45                   | n.a.                        | n.a.              |

3

4 <sup>a</sup> closest distance between the ion / amino acid corresponding to K1 or K2 and the M<sub>A</sub>-M<sub>B</sub> center; <sup>b</sup> closest distance between the ion / amino acid corresponding to K1 and the acidic residues that chelate M<sub>A</sub>-M<sub>B</sub>; <sup>c</sup> closest  
5 distance between the ion / amino acid corresponding to K2 and the substrate; <sup>d</sup> putative, see main text for details; <sup>e</sup> no substrate or ions in the active site; n.a. = not available;

1 **Table S3: Calculated RESP charges** (Related to Fig. 3). Left: The QM electrostatic potential (ESP),  
 2 required during the RESP fitting procedure to derive dATP atom charges, was calculated at the HF/6-  
 3 31G\* level of theory by using Gaussian 09. Right: Corrected charges for metal ions and ligands with  
 4 respect to AMBER RESP charges. Inset: ball and stick representation of dATP with corresponding  
 5 atomic nomenclature.

| Label | Charge    | Atom                             | $\delta q$ | $q^{eff}$ | $q^{*}_{AMBER}$ |
|-------|-----------|----------------------------------|------------|-----------|-----------------|
| PA    | 1.630320  | Mg <sub>A</sub> -Mg <sub>B</sub> | -0.25      | 1.75      | 2.00            |
| PB    | 1.752583  | O $\delta$ 1-2 (Asp13)           | 0.05       | -0.74     | -0.80           |
| PG    | 1.631219  | O $\delta$ 1-2 (Asp115)          | 0.07       | -0.73     | -0.80           |
| C5'   | 0.145097  | O $\epsilon$ 1-2 (Glu116)        | 0.05       | -0.78     | -0.82           |
| O5    | -0.653778 | O (Met14)                        | 0.06       | -0.50     | -0.56           |
| C4'   | 0.080100  |                                  |            |           |                 |
| O4    | -0.436726 |                                  |            |           |                 |
| C3'   | 0.079202  |                                  |            |           |                 |
| O3    | -0.651155 |                                  |            |           |                 |
| C2'   | 0.114262  |                                  |            |           |                 |
| C1'   | 0.217376  |                                  |            |           |                 |
| N1    | -0.864491 |                                  |            |           |                 |
| O1A   | -0.885583 |                                  |            |           |                 |
| O1B   | -0.880119 |                                  |            |           |                 |
| O1G   | -0.897715 |                                  |            |           |                 |
| C2    | 0.622012  |                                  |            |           |                 |
| O2A   | -0.895529 |                                  |            |           |                 |
| O2B   | -0.855092 |                                  |            |           |                 |
| O2G   | -0.846348 |                                  |            |           |                 |
| N3    | -0.797823 |                                  |            |           |                 |
| O3A   | -0.899244 |                                  |            |           |                 |
| O3B   | -0.903616 |                                  |            |           |                 |
| O3G   | -0.883397 |                                  |            |           |                 |
| C4    | 0.430437  |                                  |            |           |                 |
| C5    | -0.267981 |                                  |            |           |                 |
| C6    | 0.685211  |                                  |            |           |                 |
| N6    | -1.042088 |                                  |            |           |                 |
| N7    | -0.584816 |                                  |            |           |                 |
| C8    | 0.346741  |                                  |            |           |                 |
| N9    | -0.312571 |                                  |            |           |                 |
| H01   | 0.060952  |                                  |            |           |                 |
| H02   | 0.068952  |                                  |            |           |                 |
| H03   | 0.083337  |                                  |            |           |                 |
| H04   | 0.058165  |                                  |            |           |                 |
| H05   | 0.387645  |                                  |            |           |                 |
| H06   | 0.063558  |                                  |            |           |                 |
| H07   | 0.063558  |                                  |            |           |                 |
| H08   | 0.135477  |                                  |            |           |                 |
| H22   | 0.400770  |                                  |            |           |                 |
| H13   | 0.051333  |                                  |            |           |                 |
| H25   | 0.043781  |                                  |            |           |                 |
| H27   | 0.406164  |                                  |            |           |                 |

6  
 7  
 8  
 9  
 10 **Table S4: Calculated d-newbond differences** (Related to Fig. 3). Distributions of d-newbond  
 11 differences ( $d_{X,Y}$ ) for all MD systems with mean  $\mu$ , standard error  $\sigma_E$ , and confidence interval (C.I.).

|                     | $\mu$ (Å) | $\sigma_E$ (Å) | C.I.  |
|---------------------|-----------|----------------|-------|
| d-newbond (K2-K1)   | 0.02      | 0.0000447      | > 99% |
| d-newbond (K1K2-K2) | 0.14      | 0.0000545      | > 99% |
| d-newbond (K2-K1K2) | 0.14      | 0.0000545      | > 99% |
